# Supplementary material for: Engineered nanoceria cytoprotection in vivo: mitigation of reactive oxygen species and double-stranded DNA breakage due to radiation exposure
Source: Royal Society of Chemistry journal article supplement (doi:10.1039/c8nr04640a), 2018-01-01
Supplement: c8nr04640a1.pdf [file c8nr04640a1.pdf]

## **Engineered Nanoceria cytoprotection In Vivo: mitigation of Reactive Oxygen Species and Double-stranded DNA breakage due to Radiation Exposure**

Soumen Das <sup>††1</sup>, Craig J. Neal <sup>†1</sup>, Julian Ortiz<sup>1</sup>, Sudipta Seal<sup>1,2\*</sup>

<sup>1</sup>Materials Science and Engineering, Advanced Materials Processing Center, University of Central Florida, Orlando, FL 32816, USA

<sup>2</sup>College of Medicine, University of Central Florida, Orlando, FL 32816, USA

<sup>†</sup>these authors contributed equally

\*Corresponding author: Sudipta Seal, [sudipta.seal@ucf.edu](mailto:sudipta.seal@ucf.edu)

University of Central Florida, Engineering 1, Rm 207

P.O. Box 162455; Orlando, FL 32816

Present Addresses

<sup>†</sup> Aviana Molecular Therapeutic

3251 Progress Drive, Orlando, FL 32826

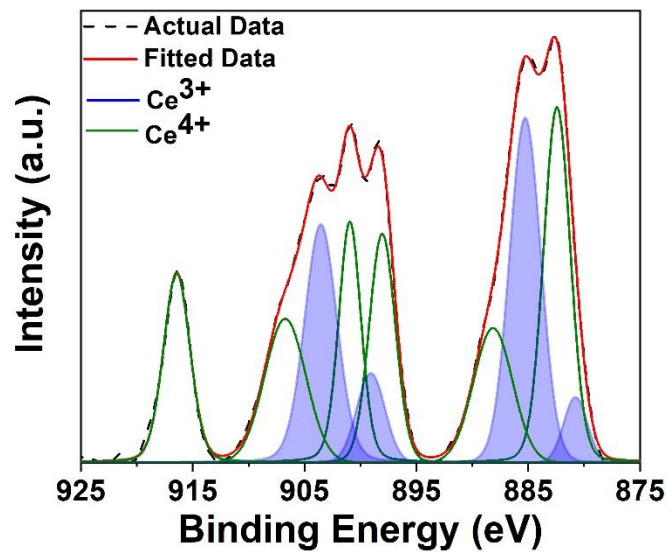

**Supplemental Figure 1.** X-ray Photoelectron spectroscopy. Cerium oxide nanoparticles were analyzed for binding energy at values particular for Ce<sup>3+</sup> and for Ce<sup>4+</sup>. Calculating these values in ratio allows the determination of Ce<sup>3+</sup>:Ce<sup>4+</sup>. This formulation of CNPs shows a very high portion of Ce<sup>3+</sup>, suggestive of cyto-protective radical oxygen scavenging activity.

\*Corresponding author: Sudipta Seal, [sudipta.seal@ucf.edu](mailto:sudipta.seal@ucf.edu)  
University of Central Florida, Engineering 1, Rm 207  
P.O. Box 162455; Orlando, FL 32816  
Present Addresses  
† Aviana Molecular Therapeutic  
3251 Progress Drive, Orlando, FL 32826
